# Supplementary material
Source: publisher figshare collection journal article supplement (https://springernature.figshare.com/ndownloader/files/20734761)
Supplement: Supplementary file [file 20734761]

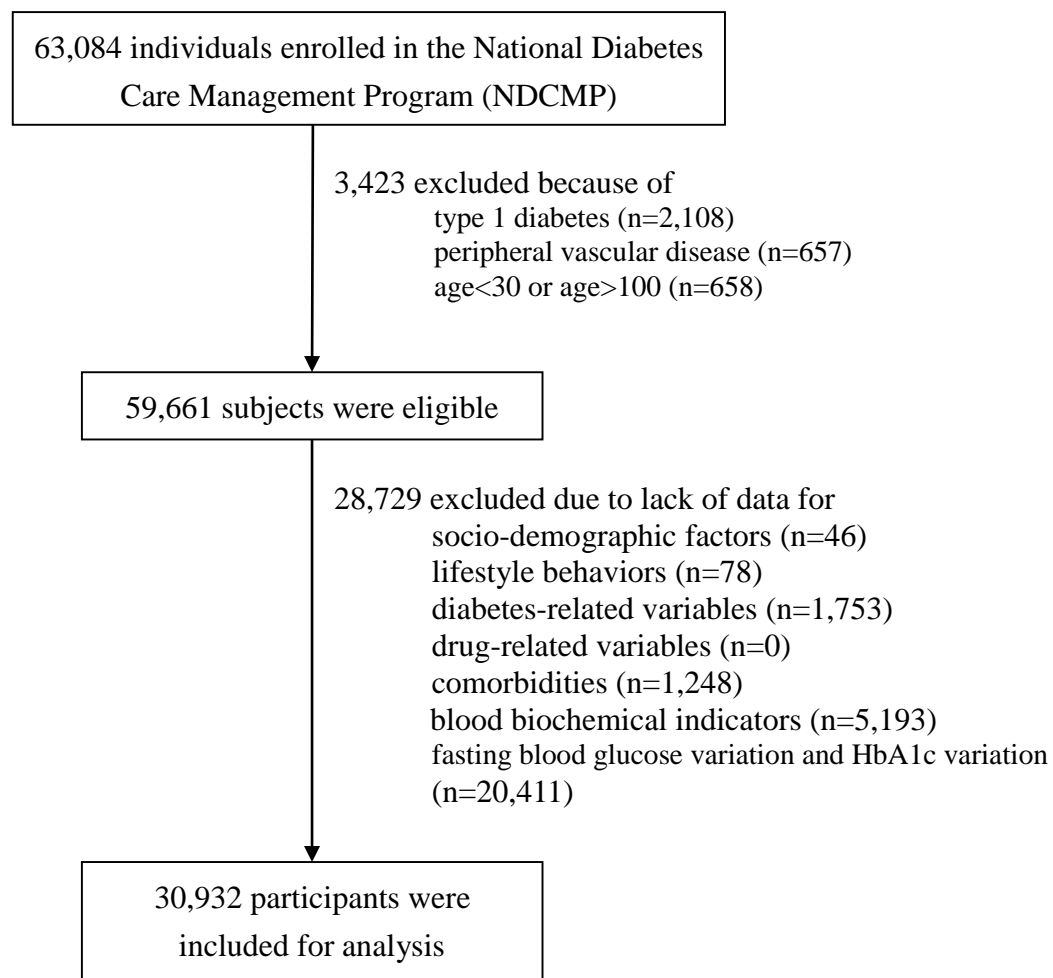

**Figure S1.** Flow chart of recruitment procedures for the study

**Table S1.** Hazard ratios (HRs) of peripheral vascular disease based on HbA<sub>1c</sub> and FPG-CV levels in persons with diabetes enrolled in the National Diabetes Care Management Program, Taiwan (n=30,932)

| Variables             | Peripheral vascular disease (N=894) |                                    |                                         |                                    |
|-----------------------|-------------------------------------|------------------------------------|-----------------------------------------|------------------------------------|
|                       | Multivariate-Adjusted <sup>1</sup>  | Multivariate-Adjusted <sup>2</sup> | Multivariate-Adjusted <sup>1</sup>      | Multivariate-Adjusted <sup>2</sup> |
| HbA <sub>1c</sub> (%) | <b>Baseline HbA<sub>1c</sub></b>    |                                    | <b>Mean first-year HbA<sub>1c</sub></b> |                                    |
| <6                    | 1.00                                | 1.00                               | 1.00                                    | 1.00                               |
| 6~8                   | 1.20 (0.90, 1.58)                   | 1.19 (0.90, 1.57)                  | 0.98 (0.73, 1.32)                       | 0.96 (0.72, 1.29)                  |
| 8~10                  | 1.06 (0.79, 1.42)                   | 1.05 (0.78, 1.41)                  | 1.12 (0.83, 1.52)                       | 1.08 (0.79, 1.48)                  |
| ≥10                   | 1.52 (1.12, 2.06)**                 | 1.50 (1.10, 2.04)**                | 1.38 (0.98, 1.94)                       | 1.29 (0.90, 1.84)                  |
| P for trend           | 0.01                                | 0.01                               | 0.002                                   | 0.02                               |
| FPG-CV (%)            |                                     |                                    |                                         |                                    |
| ≤ 17.5                | 1.00                                | 1.00                               | 1.00                                    | 1.00                               |
| 17.5-34.8             | 1.18 (1.00, 1.40)                   | 1.17 (0.99, 1.39)                  | 1.17 (0.99, 1.38)                       | 1.16 (0.98, 1.38)                  |
| >34.8                 | 1.25 (1.05, 1.48)*                  | 1.24 (1.04, 1.47)*                 | 1.24 (1.05, 1.47)*                      | 1.23 (1.03, 1.45)*                 |
| P for trend           | 0.01                                | 0.01                               | 0.009                                   | 0.02                               |

\*:p<0.05; \*\*:P<0.01; \*\*\*:p<0.001.

Multivariate-adjusted<sup>1</sup> for age, gender, alcohol consumption, smoking, diabetes duration, type of hypoglycemic medication, hypertension medication and obesity.

Multivariate-adjusted<sup>2</sup> for cardiovascular risk factors, stroke, coronary artery disease, cancer, congestive heart failure, hyperlipidemia, atrial fibrillation, hypertension, chronic hepatitis, hypoglycemia, chronic obstructive pulmonary disease and baseline fasting plasma glucose in addition to the variables in first multivariate model.

IR: incidence density rate = number of incident cases/person-years\*1000.
